# Supplementary material for: EGFR is not a major driver for osteosarcoma cell growth in vitro but contributes to starvation and chemotherapy resistance
Source: Springer Nature journal article supplement (doi:10.1186/s13046-015-0251-5), 2015-11-02
Supplement: MOESM3 [file 9778066]

Sevelda et al. Fig. S-2

**A**

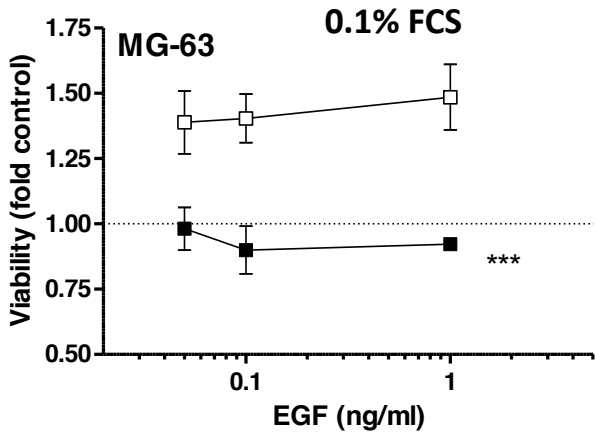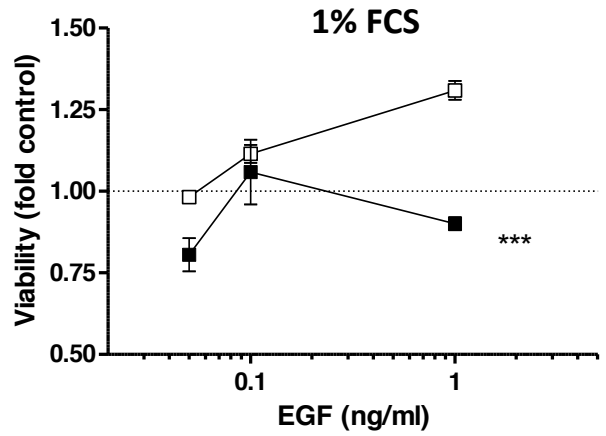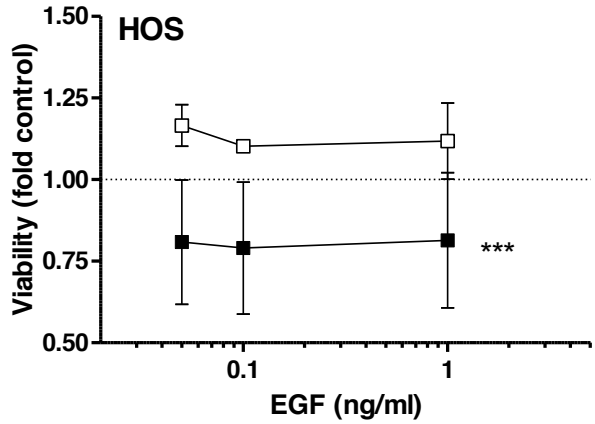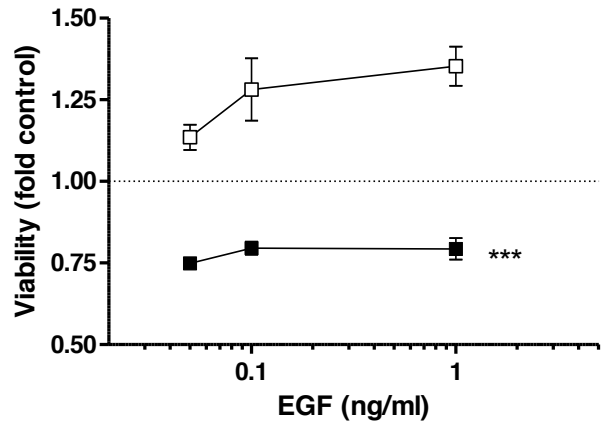

**B**

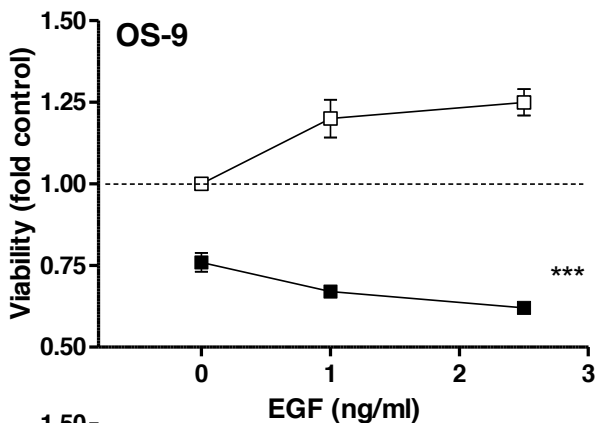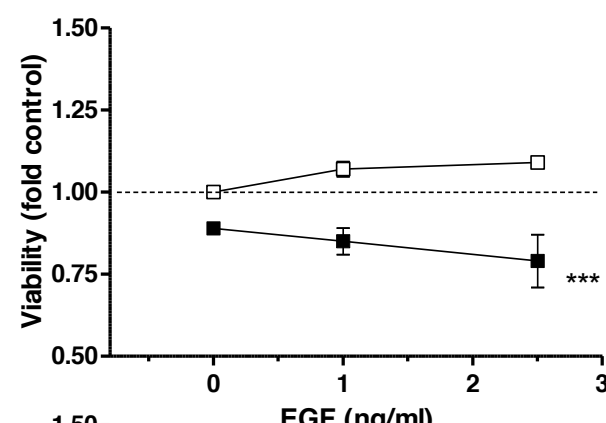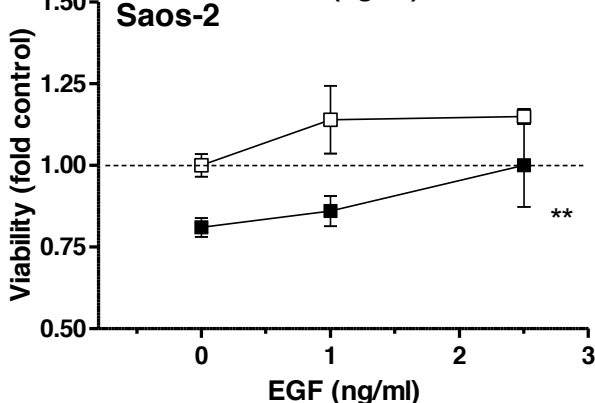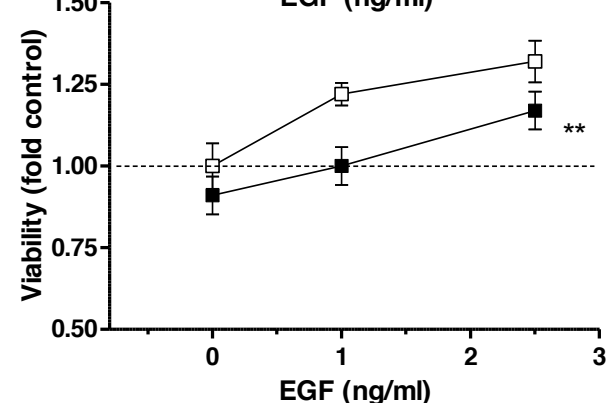

□ Gefitinib 0 μM  
 ■ Gefitinib 5 μM
