# Supplementary material for: EGFR is not a major driver for osteosarcoma cell growth in vitro but contributes to starvation and chemotherapy resistance
Source: Springer Nature journal article supplement (doi:10.1186/s13046-015-0251-5), 2015-11-02

Sevelda et al. Fig. S-4

■ G0/G1    ▨ S    □ G2/M

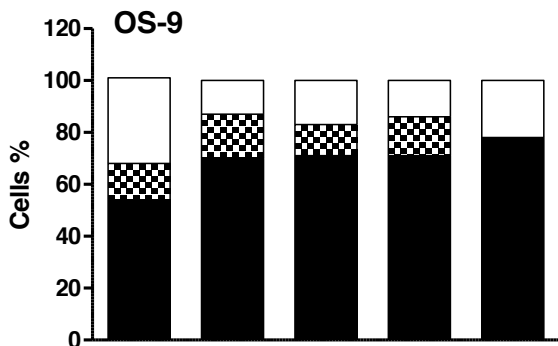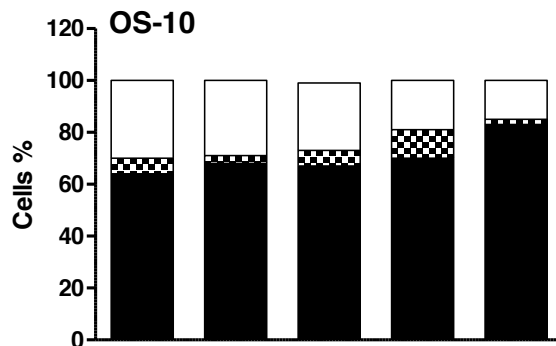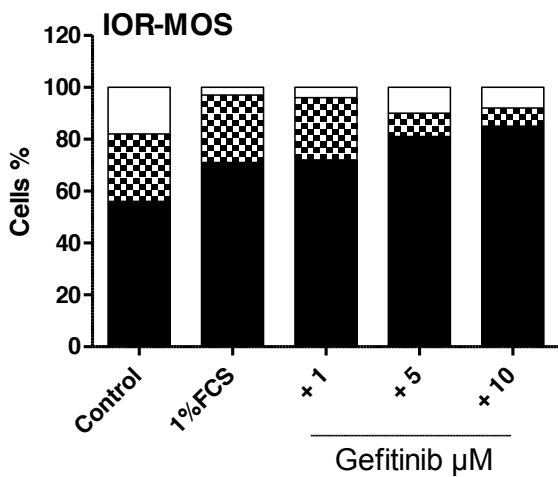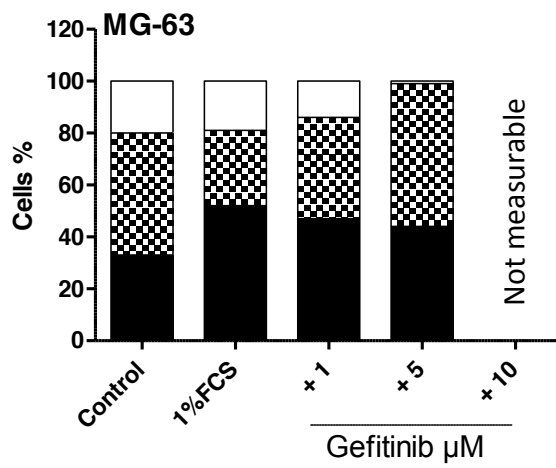

Supplement: MOESM5 [file 9778066]
